# Supplementary material
Source: Research Square preprint supplement (doi:10.21203/rs.3.rs-8936662/v1)
Supplement: Supplementary file 1 [file 6b0339a685f858d21f86a7c5.xlsx]

## Sheet: Sheet1
ID	Name_des	Molecular Weight	RT [min]	pos_ABX1	pos_ABX3	pos_ABX4	pos_ABX8	pos_ABX9	pos_CON27	pos_CON30	pos_CON31	pos_CON32	pos_CON34	FC	log2FC	Pvalue	ROC	VIP	Up.Down
Com_1_pos	C27 H44 O6 S	496.286	9.615	673.062	804.07	311.228	215.291	141.786	15214.9	5938.99	19973.3	6649.73	25534.5	0.0292647	-5.09469	4.32e-05	1	3.669	down
Com_3_pos	(5-hydroxyindol-3-yl)acetic acid	191.058	6.303	651.197	567.832	364.424	979.457	481.928	21749.5	7063.25	31018.7	6860.01	15834.5	0.0368955	-4.76041	7.51e-05	1	3.20159	down
Com_2_pos	C21 H35 N O2	333.267	9.424	1199.67	1341.04	218.531	507.777	128.605	70505.6	19011.9	109445	15152.6	60552.3	0.0123627	-6.33787	8.26e-05	1	4.54557	down
Com_4_pos	C17 H24 N2 O4	320.174	8.461	1713.89	780.787	1138.93	1286.29	544.493	9256.61	4594.6	20856.9	8620.46	13458.8	0.0962255	-3.37744	0.000123477	1	2.2779	down
Com_5_pos	C28 H47 N5 O4 S	549.334	9.613	2021.83	1499.79	262.074	826.406	923.794	27396.4	10483.3	30874.5	9720.63	43454.1	0.0453863	-4.4616	0.000156749	1	3.12116	down
Com_6_pos	urobilinogen	592.326	8.458	758.981	1009.46	464.871	251.175	184.876	14955.4	3481.24	24914.7	5223.71	9836.09	0.0456995	-4.45168	0.000223591	1	3.06646	down
Com_8_pos	C13 H23 N2 O P	254.154	9.618	2235.73	1499.79	187.167	826.406	652.961	27396.4	10483.3	30874.5	9720.63	43454.1	0.044305	-4.49639	0.000382307	1	3.22698	down
Com_10_pos	C15 H27 O5 P	318.158	8.316	2738.5	1475.51	1879.75	2357.46	1197.1	15564.4	6871.04	34328.7	11597.1	21334	0.107568	-3.21668	0.000401095	1	2.10458	down
Com_7_pos	C19 H38 N6 O2 iso	382.307	12.372	1140.45	662.072	1513.64	1990.48	896.799	5387.95	3959	5951.67	2949.7	8397.65	0.23281	-2.10278	0.000528863	1	1.49259	down
Com_11_pos	6-Hydroxy-5-methyl-4,11-dioxoundecanoic acid	244.131	6.86	1619.22	463.919	1018.28	1333.63	277.315	18658.6	5067.99	37887.6	5785.02	20373.5	0.0536883	-4.21925	0.000584221	1	2.80318	down
Com_14_pos	Arabinosylhypoxanthine iso	268.081	0.643	776.517	1935.18	1380.81	1070.06	320.713	19755.2	3034.63	16899.4	15409.3	6035.95	0.0896922	-3.47887	0.00116078	1	2.42872	down
Com_16_pos	Imiprothrin	318.158	8.42	3209.27	1201.91	999.346	1464.43	1053.06	11422.4	4093.53	28077.6	7993.53	17327.8	0.115041	-3.11979	0.00123704	1	2.01452	down
Com_17_pos	C28 H40 N2 O6	500.291	12.363	7081.47	4218.97	7825.14	12637	15128.5	43373.9	16143.2	46717	40965.3	54273.6	0.232742	-2.1032	0.00146863	1	1.46321	down
Com_27_pos	C16 H22 N2 O4	306.158	7.787	583.486	292.186	233.571	220.989	224.791	2921.8	801.057	5043.37	1131.29	2147.1	0.129105	-2.95338	0.00197264	1	1.87179	down
Com_32_pos	C9 H17 N5 O2	227.139	0.627	11125	3948.35	2252.99	4655.57	7031.8	15647.1	14339.4	22277.6	39140.9	50870.9	0.203925	-2.29389	0.00240846	1	1.58246	down
Com_29_pos	Eterobarb iso	320.137	7.958	1213.33	791.998	161.8	566.442	261.08	5773.73	1971.41	5271.32	2686.33	3967.28	0.152244	-2.71554	0.00246978	1	2.01186	down
Com_24_pos	Butopyronoxyl	226.121	6.861	967.692	850.848	649.547	1287.23	114.779	10439.3	2563.24	19726.6	3118.4	11453	0.0818193	-3.61142	0.00286322	1	2.44398	down
Com_30_pos	eicosa-5,8,11,14-tetraenoic acid 1,3-dihydroxypropan-2-yl ester iso	378.277	11.445	7222.52	1586.5	3034.26	5486.02	3754.69	21305.5	16921.1	13676.7	7604.34	22700.9	0.256469	-1.96314	0.00295996	1	1.41183	down
Com_18_pos	(2S)-3-Hydroxy-2-({[(3S,4S,5R)-2,3,4-trihydroxy-5-(hydroxymethyl)tetrahydro-2-furanyl]methyl}amino)butanoic acid (non-preferred name)	281.111	0.61	6050.6	5238.31	5348.05	7233.31	2334.02	15994	11188.1	21546	10223.3	13188.4	0.363243	-1.46099	0.00304492	1	1.03724	down
Com_25_pos	Acetylcholine	145.11	0.566	74257.4	54190.3	32834.7	28097.3	22034.2	136533	85266.1	152168	223489	87477.2	0.308664	-1.69589	0.00316244	1	1.21563	down
Com_35_pos	gaboxadol	140.059	0.576	17127.6	9155.82	7138.61	7017.39	3926.84	47388.1	16447	162003	42906.4	72119	0.130158	-2.94166	0.00391386	0.96	1.8409	down
Com_33_pos	C13 H22 N2 O4	270.158	5.642	180.133	938.524	1081.57	154.407	941.521	13934	2033.69	36420.7	2587.92	14362.2	0.0475372	-4.3948	0.00420992	1	2.90076	down
Com_13_pos	C15 H26 N10	346.236	8.988	1740.72	1065.17	1183.06	1577.57	890.108	2159.76	3811.75	3067.55	4179.06	8669.6	0.294988	-1.76127	0.00443647	1	1.18428	down
Com_31_pos	Eterobarb	320.137	8.123	1472.11	964.655	353.075	707.489	188.07	5168.61	2408.56	5099.03	3504.9	3283.91	0.189334	-2.40099	0.00467796	1	1.84977	down
Com_20_pos	C29 H45 N7 P2 iso	553.32	9.943	2594.82	3581.27	7293.41	4023.8	968.162	22978.4	10794.5	23651.4	7170.54	19703.7	0.219001	-2.19099	0.0051835	0.96	1.69064	down
Com_28_pos	3b-Hydroxy-5-cholenoic acid	374.282	9.943	3704.11	5162.48	12076.2	4166.88	1151.99	37872.6	15797.6	54943.4	10359.1	36551.3	0.168859	-2.56611	0.00541622	0.96	1.932	down
Com_44_pos	C26 H44 N10 O2 P2	590.311	8.476	706.633	987.064	269.66	368.633	418.874	9789.18	1032.83	16430.1	2996.48	6621.67	0.0746092	-3.7445	0.00542457	1	2.27344	down
Com_37_pos	Nicotinamide iso	122.048	0.631	14482.6	4711.32	6380.59	5446.84	3081.17	26242.9	8596.19	43305.2	26341	37141.7	0.240791	-2.05415	0.00556088	0.96	1.3983	down
Com_41_pos	Ethyl docosahexaenoate iso1	356.272	9.94	4934.66	9703.98	16956.6	9514.12	4046.07	53380.9	21774.8	80313.3	14663	53505.8	0.201913	-2.30819	0.00565493	0.96	1.5977	down
Com_58_pos	Levonorgestrel	312.209	9.244	2488.31	574.503	361.089	520.389	667.76	2720.57	1949.61	5509.53	2798.47	4398.73	0.265413	-1.91369	0.00629712	0.96	1.48169	down
Com_34_pos	N-acetyl-L-2-aminoadipic acid	203.08	0.555	27000.4	51297.8	9325.92	14075.5	7174.83	91643.9	68322.7	134175	100043	97371.2	0.221489	-2.17469	0.0063536	1	1.7843	down
Com_52_pos	C24 H32 O	336.245	9.242	9329.87	2565.24	2235.12	2711.42	2448.21	9912.06	7664.46	16778.2	8222.31	15401.4	0.332707	-1.58767	0.00642755	0.92	1.1923	down
Com_60_pos	C50 H86 N2 O10 P2	936.575	9.242	66993.2	13303.9	10738.9	12676.3	16528.8	73872.7	72065	92002.5	83524	132522	0.264856	-1.91672	0.0067767	1	1.55334	down
Com_38_pos	cyclo(glycyl-L-prolyl)	154.074	0.658	6000.1	1735.66	2209.09	2103.85	1524.33	10337.3	3772.67	6932.17	7250.96	13166.4	0.32738	-1.61096	0.0067885	0.96	1.14348	down
Com_50_pos	N-Acetylneuraminic acid	309.106	0.55	15373.3	11243	2463.98	8219.34	3196.52	25984	21814.4	42947.1	85119.8	20310.7	0.206428	-2.27629	0.00694851	1	1.63189	down
Com_62_pos	2-Aminodecanoic acid iso	187.157	4.836	150.375	397	419.512	580.858	374.541	10116.7	1150.94	17894.3	1310.82	8629.08	0.0491609	-4.34634	0.00707558	1	2.57948	down
Com_68_pos	3,6,8-Trimethylallantoin	200.092	0.623	1702.08	661.099	845.763	1227.12	1062.68	3132.69	1387.01	5914.27	3420.13	2758.32	0.331002	-1.59509	0.00714686	0.96	1.03547	down
Com_65_pos	Estradiol undecylate	440.329	11.499	1123.35	563.824	602.425	4050.33	1237.29	6348.94	5671.62	3989.48	5372.16	8832.7	0.250778	-1.99552	0.00734715	0.96	1.67144	down
Com_69_pos	2475675	342.256	9.242	4620.54	1201.28	950.226	1172.68	1401.57	4491.23	3165.21	9553.48	4543.75	7791.7	0.316337	-1.66046	0.00768892	0.88	1.23506	down
Com_61_pos	Evoxine	347.137	8.222	5156.97	1342.54	2779.42	2196.87	1272.92	11266.6	4332.02	18951.5	4492.22	11106.9	0.254216	-1.97587	0.00822806	0.92	1.31698	down
Com_53_pos	Veronal	184.085	0.614	4773.02	1431.06	1522.71	2049.4	836.886	8231.26	2847.51	10656.9	5293.65	9558.09	0.290074	-1.7855	0.00837029	0.96	1.28116	down
Com_76_pos	C12 H20 N O P S	257.101	0.628	6686.41	2109.95	1078.87	1713.27	1093.76	14489.7	2991.6	27797.6	10665.4	11305.4	0.188585	-2.40671	0.00860362	0.96	1.67527	down
Com_83_pos	2-Aminodecanoic acid	187.157	5.11	356.786	1360.23	1361.38	717.289	844.328	18307.7	2272.61	33346.5	2592.98	16253	0.0637603	-3.9712	0.00872786	1	2.38682	down
Com_54_pos	C12 H30 N5 O P	291.22	8.606	1277.79	269.383	456.917	324.621	165.92	2033.63	937.982	4133.26	1006.72	2288.37	0.239869	-2.05968	0.00874184	0.92	1.49466	down
Com_47_pos	2-Acetamido-2-deoxyglucose	221.09	0.552	60241.1	93121	22538.5	33430.4	17663.3	153698	158038	173368	164157	160733	0.280242	-1.83526	0.00883972	1	1.52259	down
Com_55_pos	C22 H30 N4	350.246	10.891	10821.8	2172.44	5571.82	7362.64	4036.81	31307.7	15219.3	28608.4	7873.35	47606.4	0.229419	-2.12395	0.00899771	0.96	1.40195	down
Com_67_pos	C20 H24 N2 O6 P2	450.111	8.223	7548.22	2599.29	4177.93	3086.26	1927.81	17745.6	6982.91	23705.8	5588.3	17547.1	0.270219	-1.8878	0.00907132	0.92	1.24327	down
Com_51_pos	Arabinosylhypoxanthine	268.081	2.022	424.149	8268.66	883.059	726.229	371.052	26489.3	2708.25	24449.9	18901.1	6239.3	0.135467	-2.88399	0.00916228	0.92	2.61211	down
Com_63_pos	N-(2-Cyanoethyl)-L-glutamine	199.096	0.631	4101.58	1246.12	1129.82	1266.45	569.162	6765.39	2023.08	11563.8	5315.93	7981.17	0.247052	-2.01711	0.00923522	0.96	1.44329	down
Com_77_pos	JL9700000	130.111	0.62	4199.17	1200.71	1028.66	1184.19	1051.74	8562.29	1811.79	12804.8	6013.48	9750.08	0.222494	-2.16816	0.00941627	0.96	1.47273	down
Com_101_pos	cholic acid iso	408.288	9.243	99775.1	23551.5	20999.7	27022.3	57291.5	109383	89914.1	220173	106760	185301	0.321335	-1.63785	0.00947882	0.96	1.23476	down
Com_73_pos	C23 H41 N iso	331.324	10.681	1349.91	1376.12	1428.28	1332.34	1034.46	12687.9	2729.65	6566.45	2551.44	8931.73	0.194851	-2.35956	0.00962073	1	1.45509	down
Com_86_pos	Oleic acid	282.256	11.615	256876	95727.8	90703.4	81160.3	88052	834064	285422	681289	150755	472917	0.252643	-1.98483	0.00972146	0.96	1.28473	down
Com_84_pos	C21 H30 N10	422.267	9.613	3772.87	312.238	726.564	1804.53	1273.34	3753.7	4312.55	8642.79	7985.71	11930.7	0.215412	-2.21483	0.0097694	0.96	1.71913	down
Com_57_pos	C4 H9 N10 O P	244.07	0.615	2312.66	3341.51	1573.98	1551.5	806.319	8990.16	2277.67	8859.37	17455.8	5735.81	0.221289	-2.176	0.0102471	0.92	1.41534	down
Com_95_pos	ophthalmic acid	289.127	0.622	5645.14	1468.02	872.873	1279.25	949.413	12004.1	2190.11	23406.8	8900.1	8619.1	0.185316	-2.43194	0.0103777	0.96	1.69275	down
Com_96_pos	C9 H16 N2 O6	248.101	0.621	8381.99	4795.7	1680.14	2522.11	2298.66	16838.9	4446.65	36450.8	26812.1	12609.5	0.202542	-2.3037	0.0108901	0.92	1.51634	down
Com_94_pos	N-lauroylglycine	257.199	6.792	2340.59	605.243	732.595	1105.86	533.24	3981.27	1916.12	7379.9	1540.27	4673.1	0.272824	-1.87396	0.011043	0.92	1.27381	down
Com_90_pos	C4 H13 N5 O2 P2 iso	225.055	8.223	7518.95	2503.23	4177.93	3063.02	1927.81	17441.9	6418.09	26734.3	5578.52	17974.5	0.258822	-1.94997	0.0114402	0.92	1.26135	down
Com_114_pos	C24 H43 N O5	425.314	9.236	6516.19	2117.02	2289.55	2011.05	7106.47	9995.46	6597.31	16454.2	8536.64	15554.1	0.350736	-1.51154	0.0116287	0.96	1.12336	down
Com_70_pos	calicoferol E	398.319	11.522	4198.91	2698.81	3372.49	6561.15	4495.4	17926.7	8978.31	16469.3	5167.9	26296.3	0.28497	-1.81112	0.0117333	0.96	1.13315	down
Com_92_pos	N-lauroylglycine iso	257.199	6.655	14286.9	4647.7	4663.44	7095.93	2786.38	27049.5	10557.1	49853.4	10881	38431.1	0.244789	-2.03039	0.0117517	0.92	1.34724	down
Com_91_pos	(2alpha,3alpha,5alpha,22R,23R)-2,3,22,23-Tetrahydroxystigmastan-6-one	478.366	11.857	19240.3	6114.42	8188.28	18026.5	9962.99	43928.2	16417	43185.6	20414.5	56759.8	0.340514	-1.55422	0.0118285	0.92	1.04658	down
Com_66_pos	C24 H46 N2 O3	410.351	10.758	1942.02	659.018	2270.51	2874.18	1973.03	7753.67	2710.83	6857.5	3475.29	8335.47	0.333602	-1.5838	0.0120866	0.96	1.07999	down
Com_98_pos	C25 H40 S2	404.256	9.58	3159.19	385.582	367.57	943.955	557.042	2223.3	2625.22	3098.72	3755.12	11109.5	0.237304	-2.07519	0.0124333	0.88	1.57515	down
Com_80_pos	C30 H38 N4 O2	486.299	12.145	15694.7	9946.42	8869.61	15536.7	3486.57	57910.8	11055.1	61415.3	32338.4	72353.5	0.227734	-2.13458	0.0128347	0.92	1.38563	down
Com_89_pos	C28 H46 N6 O	482.374	12.425	11594.3	6033.76	9573.74	12175.2	10149.9	52951.4	12622.1	34999	17609.8	40864.3	0.311399	-1.68316	0.0128672	1	1.036	down
Com_100_pos	C12 H12 N8	268.117	0.583	1208.47	151.484	130.134	180.372	58.9029	2406.79	362.808	4247.43	1051.88	2409.75	0.165037	-2.59914	0.01302	0.92	2.06679	down
Com_103_pos	C10 H19 O P S	218.09	0.618	9690.93	3744.16	1521.69	3112.4	1309.21	13477.9	4507.56	27884.7	18905.4	12666.2	0.250232	-1.99866	0.0132491	0.96	1.46865	down
Com_107_pos	C8 H8 N5 O P	221.047	0.599	1373.03	160.921	496.91	520.522	315.771	3807.84	1085.02	5877.85	772.583	4378.1	0.180082	-2.47327	0.0141318	0.92	1.64886	down
Com_71_pos	Uracil	112.028	0.629	19976.9	29250.3	8988.91	10576.6	5241.64	48437.5	20572.8	46658.2	64073	34331.7	0.345837	-1.53184	0.0143965	0.96	1.17532	down
Com_112_pos	C7 H14 N2 O	142.111	0.615	6335.87	1950.5	3855.91	2793.88	2081.34	15183.6	4370.45	19151.2	5507.5	12358	0.300818	-1.73304	0.0144896	0.92	1.12367	down
Com_115_pos	C21 H37 N iso	303.293	10.988	2831.13	3567.01	2448.46	4505.47	1542.58	227980	8095.19	94516.3	8662.7	113421	0.0329036	-4.92561	0.0145562	1	2.72024	down
Com_102_pos	2066503	418.236	11.266	4729.61	3253.71	693.774	2206.86	661.643	7335.54	3341.09	9874.44	8767.88	17658.6	0.245768	-2.02463	0.0146878	0.96	1.51797	down
Com_124_pos	Levetiracetam	170.106	0.625	3717.69	2299.94	1239.73	3262.93	834.701	15160.3	2360.55	47903.2	17335.5	10306.7	0.12201	-3.03493	0.0151875	0.92	1.81588	down
Com_78_pos	C26 H41 O4 P S2	512.217	11.978	1009.69	231.224	1315.49	1618.96	66.3303	16402.9	3762.41	6623.9	1398.28	6954.98	0.1207	-3.05051	0.0154783	0.96	2.36316	down
Com_123_pos	(1R,2R,3R,5Z,7E)-2-(2-Hydroxyethoxy)-9,10-secocholesta-5,7,10-triene-1,3,25-triol	476.35	11.44	7436.53	3423.43	2208.68	8732.45	5450.71	18610.3	13365.6	11637	6619.59	29480.6	0.341873	-1.54847	0.0165976	0.92	1.05035	down
Com_142_pos	1774244	173.117	0.631	1771.39	979.885	1534.25	396.658	775.21	23206.6	1258.86	44924	4907.25	17099.1	0.0597116	-4.06584	0.0166172	0.92	2.30082	down
Com_154_pos	C18 H40 N5 O3 P	405.288	8.471	8209.91	611.429	383.234	1286.86	2377.52	6663.92	5827.06	9463.27	31702.8	10793.5	0.199672	-2.3243	0.0166318	0.92	1.94367	down
Com_130_pos	4-amino-2-hydroxyamino-6-nitrotoluene	183.065	0.623	6613.8	987.735	2315.49	2616.16	1180.81	12244.6	3933.41	26569.7	4258.09	15481.1	0.21947	-2.1879	0.0176928	0.92	1.48216	down
Com_108_pos	C19 H49 N9 P2	465.357	10.051	1359.98	554.624	714.713	617.45	341.632	2114.21	1454.14	3799.59	918.284	6962.69	0.235322	-2.08729	0.0185347	0.96	1.26584	down
Com_133_pos	C16 H12 N6 O4	352.092	8.223	1658.43	337.989	659.467	465.392	268.785	3251.64	937.384	5111.9	972.053	3067.12	0.254126	-1.97639	0.0185628	0.92	1.3563	down
Com_140_pos	Cuauhtemone	252.173	6.63	7622.12	1523.55	2958.91	2613.72	1216.87	14317.2	5498.76	27790.3	3987.32	13699.1	0.244058	-2.03471	0.018641	0.92	1.37206	down
Com_152_pos	C15 H33 N O2	259.251	9.448	218.243	238.534	319	1225.23	215.88	4406.59	589.089	8343.12	717.686	5139.86	0.115485	-3.11422	0.0192059	0.92	1.91123	down
Com_159_pos	C17 H39 N7 S	373.298	11.953	989.168	338.784	601.243	667.047	493.761	8395.71	1398.22	5578.89	793.881	2923.91	0.16186	-2.62718	0.0195433	0.96	1.50789	down
Com_128_pos	Butyrophenone	148.089	12.278	798.954	285.179	539.056	1727.9	263.714	3364.35	1331.37	5136.99	857.147	2925.4	0.265496	-1.91324	0.0195936	0.92	1.35247	down
Com_125_pos	C10 H19 N3 O3 S	261.115	0.63	1103.05	264.741	310.791	290.985	107.279	1319.84	442.497	2876.55	1731.99	1150.79	0.276115	-1.85666	0.0196366	0.96	1.38654	down
Com_157_pos	N-Acetyl-L-leucine	173.105	0.627	10076.8	2010.62	1858.74	2776.61	1578.81	12147.7	3958.21	23570.3	7663.4	12970.8	0.303457	-1.72044	0.0197797	0.92	1.30979	down
Com_127_pos	C5 H14 N9 P	231.111	0.628	1348.7	421.025	253.116	288.564	163.412	1340.79	741.079	2145.54	1089.73	1658.64	0.354773	-1.49503	0.0198663	0.88	1.23725	down
Com_137_pos	Tocopherol	430.382	12.278	8471.02	2194.91	5073.69	16920.7	3798.19	29193.4	13480.3	43027.9	8967.81	29030.4	0.294733	-1.76252	0.0201019	0.92	1.28615	down
Com_134_pos	C16 H33 P3 S	350.152	6.871	2483.71	610.837	350.889	663.848	171.317	3592.44	1197.45	4443.6	1596.73	5554.09	0.261262	-1.93643	0.0202456	0.92	1.55023	down
Com_150_pos	C19 H37 N O	295.288	12.606	2637.56	494.057	1374.12	3268.81	1556.11	14458.3	2962.95	7235.81	2547.63	9433.11	0.254673	-1.97328	0.0212272	0.88	1.30761	down
Com_141_pos	C23 H45 N4 O P	424.334	11.671	4665.05	1468.69	1536.49	2897.55	1174.29	12146.6	3919.63	7035.46	2618.04	11469.2	0.315741	-1.66319	0.0215724	0.88	1.09867	down
Com_155_pos	C6 H19 N8 O3 P	282.133	0.63	1535.64	393.072	229.937	268.497	110.662	1841.24	517.146	4136.63	1537.37	1839.05	0.257085	-1.95968	0.0216289	0.96	1.5561	down
Com_163_pos	Misonidazole	201.075	0.604	4935.62	1128.21	1303.79	1924.28	794.352	7728	2406.32	17324	3199.1	11138.9	0.241319	-2.05098	0.0219501	0.92	1.38576	down
Com_121_pos	Hypoxanthine iso	136.039	0.629	248033	327143	84561.9	143761	46763.9	559026	211959	620541	814848	388539	0.327665	-1.60971	0.0219625	0.92	1.22685	down
Com_165_pos	nicotianamine	303.143	0.629	4889.98	1112.86	828.744	1319.87	927.653	4465.62	1681.46	9063.87	7575.77	5135.88	0.325153	-1.62081	0.0220856	0.92	1.23364	down
Com_143_pos	C20 H43 O2 P3 S	440.218	11.269	2091.4	1345.49	317.267	799.424	132.357	3746.45	1193.14	4594.33	3190.77	8499.63	0.220781	-2.17931	0.0226548	0.92	1.69306	down
Com_105_pos	C18 H37 N4 O3 P	388.261	10.028	1951.42	821.881	1749.67	805.161	376.981	7065.71	2251.51	3285.43	1473.68	2842.46	0.337206	-1.5683	0.0233794	0.92	1.11564	down
Com_166_pos	C10 H23 N9 O P2 S	379.124	0.628	403.122	302.56	129.65	227.334	79.9663	1088.31	179.441	1792.82	2884.06	802.248	0.169357	-2.56186	0.0255971	0.88	1.54806	down
Com_158_pos	N-Acetyl-L-glutamic acid	189.064	0.628	3854.72	3150.82	1449.57	1487.95	941.436	3619.97	2923.87	9777.94	14858	4175.78	0.307858	-1.69966	0.026867	0.88	1.08879	down
Com_199_pos	Stachydrine	143.095	0.627	10459.3	6141.03	7353.12	10270.9	6606.39	85792.3	10470.2	163727	18123.4	53241.3	0.123224	-3.02065	0.0270691	1	1.64459	down
Com_178_pos	C17 H34 N O6 P	379.211	7.11	1651.46	837.629	408.404	593.438	264.326	3055.99	580.69	4155.89	2104.45	3199.31	0.286741	-1.80218	0.0271924	0.88	1.25364	down
Com_164_pos	1794967	285.23	8.07	1830.93	566.905	584.183	707.171	287.029	2394.4	1042.58	2870.47	1023.58	3022.21	0.384055	-1.38061	0.0280155	0.92	1.01977	down
Com_194_pos	N-Acetyl-L-histidine	197.08	0.63	11908.8	2626.32	2963.59	4436.23	2615.5	12938.8	4148.61	23544.7	12579.5	14148.6	0.364464	-1.45615	0.029463	0.92	1.09636	down
Com_175_pos	C4 H16 N9 O2 P	253.118	0.626	871.88	1034.12	187.749	366.618	86.3813	1149.16	696.755	2141.7	4813.25	1295.73	0.252238	-1.98714	0.0314769	0.92	1.50299	down
Com_184_pos	C28 H54 N3 O6 P	559.372	11.551	463.505	113.178	138.748	666.247	92.408	646.399	342.633	1527.84	648.379	1244.15	0.334305	-1.58076	0.0319657	0.84	1.2726	down
Com_188_pos	N.pi.-Methyl-L-histidine	169.085	0.601	5905.57	1462.95	1938.48	2578.1	943.085	6970.01	3611.64	12727.5	3084.06	7879.2	0.374301	-1.41773	0.0320294	0.92	1.04494	down
Com_173_pos	Desonide	416.22	11.47	438.244	228.489	268.964	658.293	492.371	1265.76	392.445	2162.96	1911.43	8090.06	0.150938	-2.72798	0.0326337	0.88	1.47146	down
Com_215_pos	C5 H20 N7 O6 P	305.122	0.614	3292.02	819.871	310.417	772.889	517.005	2249.99	1483.59	3712.22	5597.46	2253.82	0.373418	-1.42114	0.0331515	0.88	1.20462	down
Com_179_pos	C30 H46 N4	462.371	12.456	8307.83	1215.74	13057.2	5904.9	1310.46	28018.5	5667.45	55859.5	12896.4	27544.2	0.229226	-2.12516	0.0342494	0.84	1.56704	down
Com_217_pos	2-(dimethylamino)-5,6-dimethylpyrimidin-4-ol	167.106	0.631	6921.49	818.55	250.692	2620.07	216.204	9883.34	3400.41	13828.5	3201.4	14482.9	0.241693	-2.04875	0.0351139	0.92	2.00624	down
Com_218_pos	(2R,3S)-3-Hydroxy-8-methyl-8-azabicyclo[3.2.1]octane-2-carboxylic acid	185.105	0.632	3967.93	949.163	739.315	1335.89	756.338	3983.12	1458.97	6239.06	2996.48	3979.83	0.41531	-1.26774	0.0353486	0.92	1.03687	down
Com_221_pos	C16 H10 N O6 P	343.026	5.52	38976.6	12159.5	5231.78	18350.3	6751.23	55686.9	17398.9	65624.3	24143.7	67596	0.353524	-1.50012	0.0355334	0.88	1.17546	down
Com_208_pos	(2E)-5-methyl-2-phenylhex-2-enal	188.12	12.278	1106.12	353.624	774.712	2073.19	458.57	3711.26	1464.17	5102.14	965.611	2677.25	0.34239	-1.54629	0.0357285	0.88	1.08306	down
Com_216_pos	C11 H17 P S	212.08	0.629	10833.8	1824.23	2568.87	3772.57	2496.05	10114.8	3495.09	19589.9	11898.1	11585.3	0.379223	-1.39888	0.0358104	0.88	1.09821	down
Com_330_pos	C8 H18 O5	194.116	3.981	4208.52	5956.4	6980.26	5759.93	2228.09	3511.1	398.778	1282.72	1452.38	2736.42	2.67905	1.42172	0.0358804	0.92	1.32973	up
Com_228_pos	3-(2-Oxo-2,3-dihydro-1,3-benzoxazol-3-yl)propanoic acid	207.053	5.52	529688	163433	66835.7	260267	94202.8	872800	230223	1.22189e+06	310027	959533	0.310039	-1.68948	0.036106	0.88	1.27466	down
Com_224_pos	C13 H23 O P S	258.122	0.628	6014.78	1380.08	911.493	1959.73	933.084	6091.84	1647.21	14039.3	6654.45	7156.93	0.314674	-1.66807	0.0361358	0.92	1.28277	down
Com_225_pos	C14 H7 O6 P	301.999	5.521	42154.1	13007	5565	20241	7633.74	60702.3	18732.7	71300.6	26022.2	73371.6	0.35422	-1.49728	0.036381	0.88	1.17303	down
Com_205_pos	C22 H47 O5 P	422.315	9.557	10335.2	3842.21	980.961	1637.05	565.226	6945.3	3229.35	16533.3	10582.6	45599.7	0.209441	-2.25538	0.0367565	0.88	1.66198	down
Com_213_pos	D-PANTOTHENIC ACID	219.111	3.768	16149.6	7125.57	1625.78	2247.05	1241.58	14355.1	8951.94	23295.8	19320.5	12852.6	0.360384	-1.47239	0.0371487	0.88	1.41559	down
Com_236_pos	2-Indolylformic acid	161.048	5.519	99866.3	27634.8	12743.9	48743.7	15963	146564	41292.5	204513	57387	169315	0.331063	-1.59482	0.0391789	0.88	1.24622	down
Com_223_pos	C12 H14 N6 O2	274.117	0.627	4711.13	663.807	560.137	1664.96	443.981	3518.78	1901.96	5424.43	7369.7	3122.24	0.376996	-1.40738	0.0392323	0.88	1.27533	down
Com_258_pos	2-Acetamido-2-deoxy-D-glucono-1,5-lactone	219.074	0.601	5238.54	896.767	142.74	1477.5	512.46	4905.45	2728.47	3957.06	6216.11	9148.77	0.306724	-1.70499	0.0400706	0.88	1.69472	down
Com_233_pos	C14 H18 N4 O4 P2	368.08	5.521	60933.9	20050.9	8905.77	28585.3	9372.59	85358.2	27500.3	93199.8	35322.5	98284	0.376396	-1.40968	0.0408091	0.88	1.11959	down
Com_254_pos	C7 H18 N9 O5 P	339.118	0.622	2267.35	1152.77	169.22	1036.06	370.272	2504.06	2003.98	2249.02	3269.25	3772.65	0.362033	-1.46581	0.0408788	0.92	1.31045	down
Com_253_pos	C14 H18 N6 O3	318.144	5.534	1841.92	326.119	424.907	613.362	259.138	3889.34	862.755	7021.37	629.579	3179.3	0.222396	-2.1688	0.0420041	0.92	1.4299	down
Com_239_pos	C16 H20 N3 P S	317.112	0.629	691.083	430.883	115.535	112.883	71.0414	941.012	195.622	2190.49	3823.93	604.492	0.183279	-2.44789	0.0438507	0.88	1.58486	down
Com_226_pos	1-Phenyl-1,3-octadecanedione	358.287	11.502	20311.8	9200.57	21530.8	20919.6	5663.03	95974.4	21037.7	73324.4	14016.8	68585	0.284408	-1.81397	0.0442116	0.84	1.11034	down
Com_272_pos	5-Indolol	133.053	6.575	685.67	669.726	681.801	604.69	442.41	23776.6	3399.66	7906.23	338.737	10723.1	0.0668402	-3.90314	0.0478007	0.8	2.05336	down
Com_230_pos	C24 H40 N2 O5	436.294	9.77	9253.59	2461.74	2819.8	3311.22	1606.04	8725.88	3080.33	16314.5	7053.25	25377.9	0.321252	-1.63822	0.048696	0.84	1.10025	down
Com_265_pos	C13 H11 N O S	229.056	9.813	7657.67	3268.53	2510.48	2643.04	143.465	43561.7	2864.44	98485.9	5827.66	16509.7	0.097	-3.36587	0.0490147	0.88	2.12061	down
Com_235_pos	C28 H43 O P S	458.276	9.767	6264.05	1454.21	1807.87	2057.37	1077.08	5366.71	2104.51	10088.8	4244.5	15535.6	0.339061	-1.56038	0.0491967	0.88	1.08108	down
Com_273_pos	C10 H12 N2 O4 P2	286.027	5.521	63877	20611.9	9399.39	33368.4	11023.8	97540.1	28151.6	98983.7	33568.4	100872	0.385058	-1.37685	0.0498505	0.88	1.0845	down
