# Supplementary material
Source: Research Square preprint supplement (doi:10.21203/rs.3.rs-8936662/v1)
Supplement: Supplementary file 2 [file 865d5ddbef0052e73b72da7e.xlsx]

## Sheet: Sheet1
ID	Name_des	Molecular Weight	RT [min]	neg_ABX1	neg_ABX3	neg_ABX4	neg_ABX8	neg_ABX9	neg_CON27	neg_CON30	neg_CON31	neg_CON32	neg_CON34	FC	log2FC	Pvalue	ROC	VIP	Up.Down
Com_10_neg	C26 H49 N2 O5 P S	532.308	9.604	29457.1	34355.2	6959.16	15636.2	21098.4	370547	279998	364278	134233	141446	0.0833056	-3.58544	0.000142808	1	2.78103	down
Com_2_neg	C31 H49 N2 O7 P	592.327	8.479	436.779	787.825	324.263	220.292	205.252	10084.9	4507.27	11171.4	4080.64	1837.07	0.0623211	-4.00413	0.000247822	1	2.98037	down
Com_5_neg	C31 H56 O2 P2 S	554.346	9.6	233.519	424.946	292.803	215.179	90.2892	1959.43	2993.06	4272.63	12119.2	1609.03	0.0547518	-4.19095	0.000375834	1	3.08113	down
Com_24_neg	C28 H51 N4 O2 P3 S	600.295	9.605	3170.5	5714.72	791.902	2657.27	3921.12	55889.2	45504.4	37863.4	22479.7	19921.1	0.0894843	-3.48222	0.000460344	1	2.77968	down
Com_1_neg	C17 H24 N2 O4	320.174	8.474	3050.69	1655.96	2690.77	1940.56	1256	14455.3	12755.8	21719.3	12148.2	4964.54	0.16041	-2.64016	0.000489451	1	1.95729	down
Com_9_neg	C28 H50 O7 S	530.328	10.909	386.298	900.219	523.88	324.412	218.77	23017	7245.95	23127.4	3120.01	4459.59	0.0386022	-4.69517	0.000547354	1	3.34749	down
Com_20_neg	C15 H20 N2 O3	276.148	8.14	803.565	1070.11	278.346	727.233	442.1	5513.56	4690.12	4778.77	3443.91	1496.84	0.166708	-2.58461	0.000656864	1	1.99258	down
Com_8_neg	C14 H27 O5 P iso	306.158	8.286	462.64	319.872	160.482	317.996	372.629	3388.05	3048.2	3649.62	2087.76	738.67	0.126517	-2.9826	0.000861434	1	2.18949	down
Com_23_neg	C27 H55 O5 P3 S	584.3	10.462	6420.65	3129.9	1587.32	2949.22	4387.43	39080.1	21560.3	26996.5	8795.32	13912	0.167426	-2.5784	0.00100631	1	1.9332	down
Com_13_neg	C17 H30 N4 S	322.218	15.845	167347	259938	251004	208980	128485	23935.8	60026.8	13467.2	14489.3	8639.81	8.42538	3.07474	0.00102087	1	2.58438	up
Com_17_neg	Eterobarb	320.138	7.969	2725.91	2316.4	764.161	1601.86	920.926	14645.7	11232.4	13422.6	9365.06	3153.49	0.160737	-2.63723	0.00125488	1	2.00826	down
Com_33_neg	C14 H32 O3 P2	310.181	12.533	188933	302861	421132	228934	212518	2626.95	4992.25	30962.2	1083.85	1299.82	33.0618	5.04709	0.00154879	1	4.84423	up
Com_7_neg	Imiprothrin	318.158	8.434	3954.17	2325.08	2146.65	1997.87	1845.45	12996.9	9549.94	21027.6	8843.19	4708.92	0.214772	-2.21912	0.00177309	1	1.60307	down
Com_3_neg	Imiprothrin iso	318.158	8.329	3419.58	2767.16	3585.94	2715.62	2528.27	19065.8	15436.8	30504.4	13888.8	6699.46	0.175437	-2.51097	0.00185471	1	1.80109	down
Com_28_neg	C33 H53 N2 P3	570.341	8.729	693.975	3060.21	163.021	459.185	122.066	6657.82	9465.54	17370.4	36415.6	5791.68	0.059424	-4.07281	0.00220981	1	3.64276	down
Com_15_neg	6-Hydroxy-5-methyl-4,11-dioxoundecanoic acid	244.131	6.87	4321.99	2991.95	3632.47	2116.57	1033.97	28827.3	16659	53088.3	9740	7787.5	0.121419	-3.04194	0.00242264	1	2.15822	down
Com_37_neg	C18 H25 O P S	320.137	8.136	1371.94	1595.91	281.158	676.235	679.035	7222.7	5664.93	5768.95	4701.18	1610.5	0.184405	-2.43905	0.0027521	1	1.92973	down
Com_27_neg	C28 H44 N4 O3 S	516.312	10.458	35392.4	20712.9	11709.5	15053.6	20635.6	228959	87927.3	181726	41814.3	69007.2	0.169836	-2.55778	0.00315619	1	1.81878	down
Com_6_neg	1,1',8-Trimethyl-2,2',3,3',8,8',8a,8a'-octahydro-1H,1'H-3a,3a'-bipyrrolo[2,3-b]indole iso	360.23	10.597	12891.4	21838.5	23949.4	15649.7	26186.4	108129	99041	107262	44002.4	34810.5	0.255605	-1.96801	0.00326682	1	1.42667	down
Com_22_neg	C10 H22 N2 O2 S2	266.113	6.87	1169.3	659.406	1562.94	783.453	128.72	10181.3	5472.8	17586.9	3446.04	2868.52	0.108804	-3.20019	0.00388725	1	2.47489	down
Com_39_neg	C13 H22 O5	258.147	6.897	190.686	314.24	400.385	347.239	222.366	1630.1	719.936	4733.11	1281.6	1041.28	0.156806	-2.67295	0.00392052	1	1.82276	down
Com_12_neg	C23 H33 N4 P S	428.218	10.593	798.7	1140.18	2636.57	2765.12	967.894	9592.07	12251.7	4959.34	4240.42	3249.65	0.242278	-2.04527	0.00427368	1	1.60295	down
Com_42_neg	C8 H16 Cl N O6	257.066	0.569	3302.69	1309.54	104.94	453.064	85.7661	20839.2	6888.47	80131.8	18207.1	4118.05	0.0403734	-4.63045	0.00441392	1	3.88251	down
Com_55_neg	C10 H28 N6 O P2	310.182	12.622	188933	302861	421132	228934	7163.49	2456.22	3478.9	30962.2	1578.68	761.827	29.2836	4.87202	0.00514386	0.96	4.24017	up
Com_11_neg	C21 H37 P3	382.212	10.592	1577.4	2346.32	3756.09	3438.37	1674.08	16458.9	20705.9	9393.68	4991.84	5144.16	0.225635	-2.14794	0.00540216	1	1.54047	down
Com_40_neg	C19 H32 N4 O2	348.252	8.255	3202.7	873.6	1255.83	1613.57	560.282	6783	5758.46	9449.26	3644.55	2689.1	0.265001	-1.91593	0.00581695	0.96	1.54445	down
Com_25_neg	C28 H50 O P2 S	496.304	9.659	214.354	1011.9	1224.81	456.948	1414.28	4962.36	5161.01	1814.35	4781.44	3054.41	0.218589	-2.1937	0.00598019	1	1.93537	down
Com_30_neg	2-Acetamido-2-deoxyglucose	221.09	0.565	10569.7	6831.55	3287.08	2164.02	1753.81	36982.3	31114.8	102463	42779.6	6664.69	0.111844	-3.16044	0.00615672	0.92	2.31093	down
Com_38_neg	C18 H16 N6	316.143	9.057	2478.65	1608.63	739.875	1551.8	1240.48	8578.98	6846.89	3567.32	5346.47	2068.51	0.288526	-1.79323	0.00615831	0.96	1.33057	down
Com_14_neg	C18 H32 O5 S	360.197	9.719	19913.9	34611.8	14381	10371	13180.5	75192.2	79289.7	89018.4	33942.2	27500.4	0.303198	-1.72167	0.00635878	0.92	1.29587	down
Com_19_neg	C17 H16 N6 O5	384.119	8.071	1254.18	616.071	1087.57	473.191	401.875	4581.09	3319.06	4695.37	1324.28	1368.24	0.250712	-1.9959	0.00650125	1	1.46997	down
Com_80_neg	C40 H75 N3 O5 P2	739.516	12.394	17904.5	5311.44	36209.1	16969.1	803.918	469.493	593.786	337.243	445.546	152.292	38.6306	5.27167	0.00665993	1	3.52607	up
Com_18_neg	C22 H6 N8 O2	414.063	8.237	1798.85	729.277	1153.86	759.63	612.71	4667.74	4207.7	5400.13	1951.92	1451.41	0.285896	-1.80644	0.00670284	0.96	1.32877	down
Com_4_neg	C28 H42 N4 iso	434.34	10.775	2280.66	1666.78	3161.11	2538.53	2234.51	9594.15	16943.3	8725.91	5142.9	3780.83	0.268892	-1.8949	0.00704556	1	1.32905	down
Com_67_neg	C19 H20 O8	376.116	7.076	6962.43	3718.3	1268.9	3601.65	2245.23	18025.6	18460.9	19226.8	6253.53	6513.54	0.259878	-1.9441	0.00739367	0.92	1.51142	down
Com_26_neg	C14 H28 O5 iso	276.194	8.379	745.624	363.58	601.367	364.726	229.269	3886.1	2069.55	4960.67	1385.42	672.325	0.177629	-2.49306	0.00784606	0.96	1.73495	down
Com_43_neg	C9 H7 N3 O12	349.002	0.565	656.441	274.086	107.738	176.804	58.6829	1500.96	1036.42	2841.22	3988.07	354.905	0.131023	-2.93211	0.00794745	0.96	2.27885	down
Com_29_neg	C14 H27 O5 P	306.158	7.799	636.328	570.5	503.959	350.735	325.061	3857.67	1872.95	4183.33	1597.16	678.3	0.195792	-2.35261	0.00826911	1	1.61399	down
Com_16_neg	callystatin A iso 1	456.324	11.911	11267.3	5409.66	13776.6	15145.8	7740.75	47659.7	102365	47811.8	25751.5	15677.6	0.222932	-2.16532	0.0085411	1	1.51645	down
Com_59_neg	C14 H32 N2 O2 P2 S	354.166	6.183	2384.18	1087.49	862.506	1190.45	631.883	5723.63	1862.35	6513.92	2549.09	2792.44	0.316669	-1.65895	0.00858047	0.96	1.25493	down
Com_57_neg	C14 H27 O7 P S	370.12	7.893	2242.41	449.591	275.418	761.024	312.176	5977.55	2712.13	13550	2907.14	1295.45	0.152809	-2.7102	0.00903595	0.96	2.07626	down
Com_63_neg	C29 H51 N2 O7 P	570.341	8.822	188.021	4830.91	236.903	1467.77	112.649	4616.02	5729.72	17860.1	30754.3	5795.39	0.10557	-3.24372	0.0103142	0.96	3.33082	down
Com_51_neg	C31 H47 N2 O7 P	590.311	8.498	434.616	926.386	482.52	214.681	181.796	5653.56	1008.73	7636.16	1798.13	906.693	0.131739	-2.92424	0.0105662	0.96	2.00519	down
Com_49_neg	C18 H34 O7 S	394.203	9.05	3362.49	2803.95	3684.05	2234.06	1375.66	19628	14073	31171.4	3686.89	7093.71	0.17792	-2.4907	0.0114824	1	1.68229	down
Com_96_neg	C7 H N2 O3 P	191.972	9.258	6117.46	1108.49	946.878	790.941	1174.32	7256.99	10298.4	5920.11	6737.62	3111.49	0.304223	-1.7168	0.0123779	0.92	1.61306	down
Com_53_neg	C16 H22 N2 O6 S	370.12	7.781	1651.15	616.964	580.681	476.319	88.7634	5477.76	2520.73	12295.1	2531.22	1123.06	0.142555	-2.81041	0.013619	0.96	2.16762	down
Com_88_neg	C48 H81 N4 O2 P3 iso	838.558	9.257	73093.8	15672.5	15625.4	11820.1	19381.3	86986.1	136375	72977.9	82102.4	33418.6	0.329222	-1.60287	0.0138982	0.92	1.39709	down
Com_34_neg	C17 H6 N10 O3 S	430.036	8.238	3085.2	1123.66	2016.68	1669.23	909.95	8439.84	6146.61	10604.1	3207.82	2154.37	0.288181	-1.79495	0.0143845	0.96	1.29329	down
Com_41_neg	4313 iso	302.079	7.62	997.389	424.231	476.164	556.403	202.6	2142.65	2374.89	6499.43	1941.16	568.142	0.196417	-2.34801	0.0157424	0.96	1.61868	down
Com_253_neg	C23 H34 N2 O2 P2	432.21	11.001	18477.5	22433.2	23685.2	34387.6	39048.1	23000.7	10799.3	12579.3	7113.67	5154.8	2.35357	1.23485	0.0164407	0.92	1.06929	up
Com_64_neg	C19 H16 N4 O2	332.126	6.889	1970.67	985.573	479.199	802.358	328.258	5265.61	4055.45	7455.34	1262.59	1479.63	0.233933	-2.09583	0.0164581	0.92	1.56809	down
Com_61_neg	(+/-)-Camphoric acid	200.105	8.302	2290.5	714.015	713.393	464.667	430.281	4144.65	1944.14	7013.65	2277.8	1167.58	0.278759	-1.84291	0.0171481	0.88	1.42822	down
Com_32_neg	C18 H25 O4 P3	398.098	8.274	3045	1552.26	2581.03	2037.96	1012.3	7338.53	5686.13	9783.06	3099.14	2576.65	0.359104	-1.47753	0.0171903	0.92	1.07063	down
Com_36_neg	Combretastatin A-4	316.132	8.071	6908.39	4306.65	4147.06	3503.24	2108.92	18725	14190.6	21451.8	5534.3	5950.66	0.318504	-1.65061	0.0174982	0.92	1.17459	down
Com_90_neg	4-amino-cinnamic acid	163.063	5.488	28666.6	11665	6073.1	13632.1	5735.91	47488.7	43099.7	53642.8	32793	13665.3	0.34492	-1.53566	0.0180749	0.96	1.25802	down
Com_45_neg	C16 H30 N6 O8	434.213	13.185	4692.31	1860.39	4301.78	4044.54	5194.21	14754	25402.1	4664.76	13789.2	7178.3	0.305422	-1.71112	0.0185355	0.92	1.23412	down
Com_85_neg	C17 H24 N6 O3 P2	422.14	10.343	356.565	181.808	360.386	351.955	180.479	3632.65	1468.73	3307.67	287.891	1148.13	0.145371	-2.78218	0.0190579	0.88	1.82577	down
Com_68_neg	C19 H29 N4 O3 P S	424.169	6.637	1368.81	179.619	892.064	303.131	189.308	2788.75	2690.85	4311.91	1019.89	826.574	0.252014	-1.98842	0.0199605	0.88	1.6912	down
Com_83_neg	C15 H29 O4 P3	366.127	6.882	1919.79	491.269	713.385	582.277	445.985	2843.23	2148.54	2495.39	1315.48	1048.02	0.421567	-1.24617	0.020491	0.92	1.05666	down
Com_91_neg	trichotriol iso	286.178	6.183	11274.9	5778.23	4096.09	5262.94	3289.44	21362.1	7917.45	26293.3	9365.75	10698.6	0.392685	-1.34855	0.0204926	0.88	1.01902	down
Com_47_neg	C14 H26 O6	290.173	7.991	838.316	628.524	758.202	598.617	368.593	2319.99	2505.14	6212.3	1235.56	813.416	0.243936	-2.03542	0.0215805	0.96	1.32145	down
Com_87_neg	Dibutyl malate	246.147	8.149	7919.06	2287.87	1953.48	3240.94	1659.78	15520.3	6806.64	25819.5	7911.81	3832.21	0.284873	-1.81161	0.0237551	0.88	1.34459	down
Com_74_neg	C11 H18 N6 O4	298.139	6.882	3880.69	1410.22	1401.22	1162.06	798.954	6423.19	4032.8	5685.29	3010.11	1872.27	0.41159	-1.28072	0.0250778	0.92	1.04958	down
Com_48_neg	Acetylshikonin iso 1	330.111	8.23	77536	37327	58708.2	36268.3	27073.2	191441	146536	303806	71218.6	52387.1	0.309533	-1.69184	0.0281201	0.88	1.15933	down
Com_82_neg	Dodecanedioic acid iso 2	230.152	9.216	1289.3	15642.4	8712.11	11403.5	4551.68	52821.7	15155.4	55644	21009.9	14399.2	0.261579	-1.93468	0.0288494	0.92	1.63238	down
Com_99_neg	DIBUTOXYETHYLPHTHALATE	366.205	7.151	136.594	116.791	814.448	194.325	76.7674	4238.72	873.444	7851.41	489.584	336.619	0.0970954	-3.36445	0.0288648	0.92	2.22074	down
Com_277_neg	13-Hydroxykaur-16-en-18-oic acid iso	318.219	10.806	6042.91	11078.2	12257	5577.09	17474.2	8270.59	1862.71	4887.8	3684.78	1358.02	2.61312	1.38577	0.0292997	0.92	1.19953	up
Com_140_neg	C19 H23 N2 O4 P3	436.089	5.531	12946.3	1334.79	274.484	2123.02	386.945	24663.8	5753.09	48537.2	5514.04	7425.25	0.18571	-2.42887	0.0293758	0.88	2.48987	down
Com_76_neg	C20 H34 O4 P2	400.192	11.634	14943.5	4338.77	6159.38	1252.48	3373.01	49555	46054.7	42289.3	9617.54	5554.59	0.196426	-2.34794	0.0307714	0.88	1.76407	down
Com_106_neg	C18 H19 N4 P S	354.108	8.918	1607.64	1566.07	1783.11	1050.65	1122.85	13019.7	4659.37	9934.91	1547.7	2816.36	0.222975	-2.16504	0.0319374	0.88	1.36923	down
Com_119_neg	C26 H40 N6 O2	468.32	9.571	4324.98	1957.11	624.172	687.082	415.682	4000	2560.56	6240.08	4246.49	4640.39	0.369292	-1.43717	0.0321301	0.88	1.47686	down
Com_165_neg	C6 H3 N O5 P2 S	262.921	17.938	70130.7	155433	288185	109300	108473	52397.4	117865	27468.2	62108.9	18663.1	2.62662	1.39321	0.0325674	0.88	1.15599	up
Com_261_neg	C30 H50 O12	602.331	10.146	15440.4	2100.01	3648.51	2447.76	2323.9	1332.96	2889.67	654.786	1049.97	346.471	4.1379	2.0489	0.0330396	0.88	1.48901	up
Com_134_neg	C6 H11 N3 O4 S	221.047	0.587	2817.25	384.266	426.236	782.789	924.737	4872.77	2621.02	7079.55	1425.99	1333.5	0.307813	-1.69987	0.0332289	0.88	1.39808	down
Com_72_neg	NSC 1775	242.131	8.235	1476.48	426.371	838.665	445.319	355.439	2904.54	1981.9	4462.89	1037.53	739.838	0.318358	-1.65128	0.0332698	0.88	1.21414	down
Com_108_neg	C15 H12 N6 O2	308.103	8.918	2169.33	2381.02	2331.39	1389.44	1438.09	17426.2	6032.89	13068	2056.19	3665.32	0.229813	-2.12147	0.034493	0.88	1.33858	down
Com_58_neg	8-Hydroxyhexadecanedioic acid	302.21	9.187	6538.85	5474.29	5241.51	3862.18	2894.32	22378.2	17112.7	26928.7	6443.81	5156.99	0.307755	-1.70015	0.0349861	0.84	1.12161	down
Com_122_neg	C28 H42 N4 O iso	450.335	10.31	669.153	787.867	929.584	381.435	255.44	13195	2768.23	20782.3	1545.2	698.129	0.0775472	-3.68878	0.0350571	0.92	2.14352	down
Com_77_neg	C22 H45 N8 O3 P S	532.308	9.334	10195.9	11067.1	12323.8	10718.8	6792.49	52144.5	27470	62944.3	16948.5	10600.6	0.300387	-1.73511	0.0359159	0.88	1.11394	down
Com_75_neg	3alpha,7alpha,12alpha-trihydroxy-5beta-cholestan-26-al iso1	434.34	11.676	3641.74	1507.03	5578.83	4642.58	3079	14499.7	10861.6	25634.6	5293.64	3965.17	0.306187	-1.70752	0.0360056	0.88	1.15801	down
Com_194_neg	C25 H40 N2 O10 iso1	528.268	10.595	55523	144707	309576	203826	45097.4	48333.9	81760.6	16515.8	45335.7	13262.4	3.69736	1.8865	0.0364631	0.84	1.40021	up
Com_197_neg	C37 H73 N4 O4 P	668.54	12.464	14214.3	11552.1	28310.1	17338.7	9258.45	7456.86	9542.81	6057.21	8456.24	1661.63	2.43178	1.28201	0.0375901	0.96	1.05865	up
Com_69_neg	C30 H40 N4 O iso2	472.319	10.473	9484.45	7434.29	8561.63	4702.98	4133.75	35394.1	46803.3	29364.4	7455.32	8833.61	0.268415	-1.89746	0.0376012	0.88	1.23059	down
Com_101_neg	C13 H29 N8 O P S	376.192	9.263	7132.45	4412.79	3182.45	3849.41	4313.21	17955.9	12294.7	45672.5	5649.32	7189.44	0.257885	-1.9552	0.037615	0.96	1.22734	down
Com_56_neg	C18 H30 N2 O8	402.2	10.886	1863.53	2127.34	2327.79	1770.34	1248.69	8532.7	17148.9	6945.58	4531.48	1585.55	0.241009	-2.05284	0.0380996	0.84	1.30772	down
Com_118_neg	C18 H18 N6 O2 S	382.12	8.614	1668.51	621.56	1037.46	485.425	202.197	5198.24	974.068	11320.3	3019.11	990.293	0.186734	-2.42094	0.0401687	0.84	1.63296	down
Com_111_neg	C26 H47 N2 O6 P S	546.287	9.323	2186.9	3244.33	4408.15	2299.32	680.231	33509.5	8329.01	35932	4077.06	2768.64	0.151495	-2.72266	0.0423892	0.88	1.70342	down
Com_62_neg	(9E)-9-Octadecenedioic acid	312.23	10.887	34240.3	34311.1	39069.6	42669.1	27537	166045	304407	169280	75210.1	29367.9	0.238915	-2.06543	0.0430784	0.84	1.29417	down
Com_150_neg	C6 H10 O7 S	226.015	0.575	2855.12	438.357	287.106	479.38	144.511	5651.76	729.351	16905.5	1820.88	1465.02	0.158227	-2.65994	0.0434479	0.88	2.00954	down
Com_79_neg	6-Hydroxypentadecanedioic acid	288.194	6.637	18686.7	5432.61	12555.5	6861.41	3794.72	36467.5	29680.6	58814.9	13503.4	8685.71	0.321646	-1.63645	0.0434609	0.88	1.20131	down
Com_113_neg	C10 H19 N4 O3 P3	336.068	2.023	327.653	3378	437.365	207.115	192.057	8887.39	1475.2	6384.39	4823.88	438.443	0.206376	-2.27665	0.0438441	0.92	2.02274	down
Com_102_neg	3-Hydroxytetradecanedioic acid	274.178	8.181	8821.99	5169.07	6654.9	3022.12	1975.95	32713.9	9905.47	33497.6	6877.13	6280.94	0.287248	-1.79963	0.0444152	0.88	1.23942	down
Com_408_neg	9-KODE iso	294.22	10.71	7519.26	6447.78	7115.08	11555.2	20668.3	1208	4332.61	11237	2664.73	2754.12	2.40154	1.26396	0.044928	0.88	1.1843	up
Com_89_neg	N-Acetylneuraminic acid	309.106	0.565	8037.12	6390.95	3726.78	5806.89	1970	10623.9	22508.5	29546.4	36307.1	3491	0.25305	-1.98251	0.0481256	0.84	1.34137	down
Com_236_neg	C H2 Cl N6 O4 P3 S4	417.793	0.542	7059.9	20163.9	22642.7	9030.33	16564.8	5989.16	14807	2768.17	6579.02	2092.31	2.34093	1.22708	0.0484096	0.92	1.09896	up
Com_81_neg	C17 H37 P3	334.212	10.887	8260.52	8859.56	10615.2	7645.15	6393.93	36602.4	76083.9	37480.6	17682.6	6550.03	0.239533	-2.06171	0.0487601	0.84	1.27502	down
ID	Name_des	Molecular Weight	RT [min]	pos_ABX1	pos_ABX3	pos_ABX4	pos_ABX8	pos_ABX9	pos_CON27	pos_CON30	pos_CON31	pos_CON32	pos_CON34	FC	log2FC	Pvalue	ROC	VIP	Up.Down
Com_1_pos	C27 H44 O6 S	496.286	9.615	673.062	804.07	311.228	215.291	141.786	15214.9	5938.99	19973.3	6649.73	25534.5	0.0292647	-5.09469	4.32e-05	1	3.669	down
Com_3_pos	(5-hydroxyindol-3-yl)acetic acid	191.058	6.303	651.197	567.832	364.424	979.457	481.928	21749.5	7063.25	31018.7	6860.01	15834.5	0.0368955	-4.76041	7.51e-05	1	3.20159	down
Com_2_pos	C21 H35 N O2	333.267	9.424	1199.67	1341.04	218.531	507.777	128.605	70505.6	19011.9	109445	15152.6	60552.3	0.0123627	-6.33787	8.26e-05	1	4.54557	down
Com_4_pos	C17 H24 N2 O4	320.174	8.461	1713.89	780.787	1138.93	1286.29	544.493	9256.61	4594.6	20856.9	8620.46	13458.8	0.0962255	-3.37744	0.000123477	1	2.2779	down
Com_5_pos	C28 H47 N5 O4 S	549.334	9.613	2021.83	1499.79	262.074	826.406	923.794	27396.4	10483.3	30874.5	9720.63	43454.1	0.0453863	-4.4616	0.000156749	1	3.12116	down
Com_6_pos	urobilinogen	592.326	8.458	758.981	1009.46	464.871	251.175	184.876	14955.4	3481.24	24914.7	5223.71	9836.09	0.0456995	-4.45168	0.000223591	1	3.06646	down
Com_8_pos	C13 H23 N2 O P	254.154	9.618	2235.73	1499.79	187.167	826.406	652.961	27396.4	10483.3	30874.5	9720.63	43454.1	0.044305	-4.49639	0.000382307	1	3.22698	down
Com_10_pos	C15 H27 O5 P	318.158	8.316	2738.5	1475.51	1879.75	2357.46	1197.1	15564.4	6871.04	34328.7	11597.1	21334	0.107568	-3.21668	0.000401095	1	2.10458	down
Com_7_pos	C19 H38 N6 O2 iso	382.307	12.372	1140.45	662.072	1513.64	1990.48	896.799	5387.95	3959	5951.67	2949.7	8397.65	0.23281	-2.10278	0.000528863	1	1.49259	down
Com_11_pos	6-Hydroxy-5-methyl-4,11-dioxoundecanoic acid	244.131	6.86	1619.22	463.919	1018.28	1333.63	277.315	18658.6	5067.99	37887.6	5785.02	20373.5	0.0536883	-4.21925	0.000584221	1	2.80318	down
Com_14_pos	Arabinosylhypoxanthine iso	268.081	0.643	776.517	1935.18	1380.81	1070.06	320.713	19755.2	3034.63	16899.4	15409.3	6035.95	0.0896922	-3.47887	0.00116078	1	2.42872	down
Com_16_pos	Imiprothrin	318.158	8.42	3209.27	1201.91	999.346	1464.43	1053.06	11422.4	4093.53	28077.6	7993.53	17327.8	0.115041	-3.11979	0.00123704	1	2.01452	down
Com_17_pos	C28 H40 N2 O6	500.291	12.363	7081.47	4218.97	7825.14	12637	15128.5	43373.9	16143.2	46717	40965.3	54273.6	0.232742	-2.1032	0.00146863	1	1.46321	down
Com_27_pos	C16 H22 N2 O4	306.158	7.787	583.486	292.186	233.571	220.989	224.791	2921.8	801.057	5043.37	1131.29	2147.1	0.129105	-2.95338	0.00197264	1	1.87179	down
Com_32_pos	C9 H17 N5 O2	227.139	0.627	11125	3948.35	2252.99	4655.57	7031.8	15647.1	14339.4	22277.6	39140.9	50870.9	0.203925	-2.29389	0.00240846	1	1.58246	down
Com_29_pos	Eterobarb iso	320.137	7.958	1213.33	791.998	161.8	566.442	261.08	5773.73	1971.41	5271.32	2686.33	3967.28	0.152244	-2.71554	0.00246978	1	2.01186	down
Com_24_pos	Butopyronoxyl	226.121	6.861	967.692	850.848	649.547	1287.23	114.779	10439.3	2563.24	19726.6	3118.4	11453	0.0818193	-3.61142	0.00286322	1	2.44398	down
Com_30_pos	eicosa-5,8,11,14-tetraenoic acid 1,3-dihydroxypropan-2-yl ester iso	378.277	11.445	7222.52	1586.5	3034.26	5486.02	3754.69	21305.5	16921.1	13676.7	7604.34	22700.9	0.256469	-1.96314	0.00295996	1	1.41183	down
Com_18_pos	(2S)-3-Hydroxy-2-({[(3S,4S,5R)-2,3,4-trihydroxy-5-(hydroxymethyl)tetrahydro-2-furanyl]methyl}amino)butanoic acid (non-preferred name)	281.111	0.61	6050.6	5238.31	5348.05	7233.31	2334.02	15994	11188.1	21546	10223.3	13188.4	0.363243	-1.46099	0.00304492	1	1.03724	down
Com_25_pos	Acetylcholine	145.11	0.566	74257.4	54190.3	32834.7	28097.3	22034.2	136533	85266.1	152168	223489	87477.2	0.308664	-1.69589	0.00316244	1	1.21563	down
Com_35_pos	gaboxadol	140.059	0.576	17127.6	9155.82	7138.61	7017.39	3926.84	47388.1	16447	162003	42906.4	72119	0.130158	-2.94166	0.00391386	0.96	1.8409	down
Com_33_pos	C13 H22 N2 O4	270.158	5.642	180.133	938.524	1081.57	154.407	941.521	13934	2033.69	36420.7	2587.92	14362.2	0.0475372	-4.3948	0.00420992	1	2.90076	down
Com_13_pos	C15 H26 N10	346.236	8.988	1740.72	1065.17	1183.06	1577.57	890.108	2159.76	3811.75	3067.55	4179.06	8669.6	0.294988	-1.76127	0.00443647	1	1.18428	down
Com_31_pos	Eterobarb	320.137	8.123	1472.11	964.655	353.075	707.489	188.07	5168.61	2408.56	5099.03	3504.9	3283.91	0.189334	-2.40099	0.00467796	1	1.84977	down
Com_20_pos	C29 H45 N7 P2 iso	553.32	9.943	2594.82	3581.27	7293.41	4023.8	968.162	22978.4	10794.5	23651.4	7170.54	19703.7	0.219001	-2.19099	0.0051835	0.96	1.69064	down
Com_28_pos	3b-Hydroxy-5-cholenoic acid	374.282	9.943	3704.11	5162.48	12076.2	4166.88	1151.99	37872.6	15797.6	54943.4	10359.1	36551.3	0.168859	-2.56611	0.00541622	0.96	1.932	down
Com_44_pos	C26 H44 N10 O2 P2	590.311	8.476	706.633	987.064	269.66	368.633	418.874	9789.18	1032.83	16430.1	2996.48	6621.67	0.0746092	-3.7445	0.00542457	1	2.27344	down
Com_37_pos	Nicotinamide iso	122.048	0.631	14482.6	4711.32	6380.59	5446.84	3081.17	26242.9	8596.19	43305.2	26341	37141.7	0.240791	-2.05415	0.00556088	0.96	1.3983	down
Com_41_pos	Ethyl docosahexaenoate iso1	356.272	9.94	4934.66	9703.98	16956.6	9514.12	4046.07	53380.9	21774.8	80313.3	14663	53505.8	0.201913	-2.30819	0.00565493	0.96	1.5977	down
Com_58_pos	Levonorgestrel	312.209	9.244	2488.31	574.503	361.089	520.389	667.76	2720.57	1949.61	5509.53	2798.47	4398.73	0.265413	-1.91369	0.00629712	0.96	1.48169	down
Com_34_pos	N-acetyl-L-2-aminoadipic acid	203.08	0.555	27000.4	51297.8	9325.92	14075.5	7174.83	91643.9	68322.7	134175	100043	97371.2	0.221489	-2.17469	0.0063536	1	1.7843	down
Com_52_pos	C24 H32 O	336.245	9.242	9329.87	2565.24	2235.12	2711.42	2448.21	9912.06	7664.46	16778.2	8222.31	15401.4	0.332707	-1.58767	0.00642755	0.92	1.1923	down
Com_60_pos	C50 H86 N2 O10 P2	936.575	9.242	66993.2	13303.9	10738.9	12676.3	16528.8	73872.7	72065	92002.5	83524	132522	0.264856	-1.91672	0.0067767	1	1.55334	down
Com_38_pos	cyclo(glycyl-L-prolyl)	154.074	0.658	6000.1	1735.66	2209.09	2103.85	1524.33	10337.3	3772.67	6932.17	7250.96	13166.4	0.32738	-1.61096	0.0067885	0.96	1.14348	down
Com_50_pos	N-Acetylneuraminic acid	309.106	0.55	15373.3	11243	2463.98	8219.34	3196.52	25984	21814.4	42947.1	85119.8	20310.7	0.206428	-2.27629	0.00694851	1	1.63189	down
Com_62_pos	2-Aminodecanoic acid iso	187.157	4.836	150.375	397	419.512	580.858	374.541	10116.7	1150.94	17894.3	1310.82	8629.08	0.0491609	-4.34634	0.00707558	1	2.57948	down
Com_68_pos	3,6,8-Trimethylallantoin	200.092	0.623	1702.08	661.099	845.763	1227.12	1062.68	3132.69	1387.01	5914.27	3420.13	2758.32	0.331002	-1.59509	0.00714686	0.96	1.03547	down
Com_65_pos	Estradiol undecylate	440.329	11.499	1123.35	563.824	602.425	4050.33	1237.29	6348.94	5671.62	3989.48	5372.16	8832.7	0.250778	-1.99552	0.00734715	0.96	1.67144	down
Com_69_pos	2475675	342.256	9.242	4620.54	1201.28	950.226	1172.68	1401.57	4491.23	3165.21	9553.48	4543.75	7791.7	0.316337	-1.66046	0.00768892	0.88	1.23506	down
Com_61_pos	Evoxine	347.137	8.222	5156.97	1342.54	2779.42	2196.87	1272.92	11266.6	4332.02	18951.5	4492.22	11106.9	0.254216	-1.97587	0.00822806	0.92	1.31698	down
Com_53_pos	Veronal	184.085	0.614	4773.02	1431.06	1522.71	2049.4	836.886	8231.26	2847.51	10656.9	5293.65	9558.09	0.290074	-1.7855	0.00837029	0.96	1.28116	down
Com_76_pos	C12 H20 N O P S	257.101	0.628	6686.41	2109.95	1078.87	1713.27	1093.76	14489.7	2991.6	27797.6	10665.4	11305.4	0.188585	-2.40671	0.00860362	0.96	1.67527	down
Com_83_pos	2-Aminodecanoic acid	187.157	5.11	356.786	1360.23	1361.38	717.289	844.328	18307.7	2272.61	33346.5	2592.98	16253	0.0637603	-3.9712	0.00872786	1	2.38682	down
Com_54_pos	C12 H30 N5 O P	291.22	8.606	1277.79	269.383	456.917	324.621	165.92	2033.63	937.982	4133.26	1006.72	2288.37	0.239869	-2.05968	0.00874184	0.92	1.49466	down
Com_47_pos	2-Acetamido-2-deoxyglucose	221.09	0.552	60241.1	93121	22538.5	33430.4	17663.3	153698	158038	173368	164157	160733	0.280242	-1.83526	0.00883972	1	1.52259	down
Com_55_pos	C22 H30 N4	350.246	10.891	10821.8	2172.44	5571.82	7362.64	4036.81	31307.7	15219.3	28608.4	7873.35	47606.4	0.229419	-2.12395	0.00899771	0.96	1.40195	down
Com_67_pos	C20 H24 N2 O6 P2	450.111	8.223	7548.22	2599.29	4177.93	3086.26	1927.81	17745.6	6982.91	23705.8	5588.3	17547.1	0.270219	-1.8878	0.00907132	0.92	1.24327	down
Com_51_pos	Arabinosylhypoxanthine	268.081	2.022	424.149	8268.66	883.059	726.229	371.052	26489.3	2708.25	24449.9	18901.1	6239.3	0.135467	-2.88399	0.00916228	0.92	2.61211	down
Com_63_pos	N-(2-Cyanoethyl)-L-glutamine	199.096	0.631	4101.58	1246.12	1129.82	1266.45	569.162	6765.39	2023.08	11563.8	5315.93	7981.17	0.247052	-2.01711	0.00923522	0.96	1.44329	down
Com_77_pos	JL9700000	130.111	0.62	4199.17	1200.71	1028.66	1184.19	1051.74	8562.29	1811.79	12804.8	6013.48	9750.08	0.222494	-2.16816	0.00941627	0.96	1.47273	down
Com_101_pos	cholic acid iso	408.288	9.243	99775.1	23551.5	20999.7	27022.3	57291.5	109383	89914.1	220173	106760	185301	0.321335	-1.63785	0.00947882	0.96	1.23476	down
Com_73_pos	C23 H41 N iso	331.324	10.681	1349.91	1376.12	1428.28	1332.34	1034.46	12687.9	2729.65	6566.45	2551.44	8931.73	0.194851	-2.35956	0.00962073	1	1.45509	down
Com_86_pos	Oleic acid	282.256	11.615	256876	95727.8	90703.4	81160.3	88052	834064	285422	681289	150755	472917	0.252643	-1.98483	0.00972146	0.96	1.28473	down
Com_84_pos	C21 H30 N10	422.267	9.613	3772.87	312.238	726.564	1804.53	1273.34	3753.7	4312.55	8642.79	7985.71	11930.7	0.215412	-2.21483	0.0097694	0.96	1.71913	down
Com_57_pos	C4 H9 N10 O P	244.07	0.615	2312.66	3341.51	1573.98	1551.5	806.319	8990.16	2277.67	8859.37	17455.8	5735.81	0.221289	-2.176	0.0102471	0.92	1.41534	down
Com_95_pos	ophthalmic acid	289.127	0.622	5645.14	1468.02	872.873	1279.25	949.413	12004.1	2190.11	23406.8	8900.1	8619.1	0.185316	-2.43194	0.0103777	0.96	1.69275	down
Com_96_pos	C9 H16 N2 O6	248.101	0.621	8381.99	4795.7	1680.14	2522.11	2298.66	16838.9	4446.65	36450.8	26812.1	12609.5	0.202542	-2.3037	0.0108901	0.92	1.51634	down
Com_94_pos	N-lauroylglycine	257.199	6.792	2340.59	605.243	732.595	1105.86	533.24	3981.27	1916.12	7379.9	1540.27	4673.1	0.272824	-1.87396	0.011043	0.92	1.27381	down
Com_90_pos	C4 H13 N5 O2 P2 iso	225.055	8.223	7518.95	2503.23	4177.93	3063.02	1927.81	17441.9	6418.09	26734.3	5578.52	17974.5	0.258822	-1.94997	0.0114402	0.92	1.26135	down
Com_114_pos	C24 H43 N O5	425.314	9.236	6516.19	2117.02	2289.55	2011.05	7106.47	9995.46	6597.31	16454.2	8536.64	15554.1	0.350736	-1.51154	0.0116287	0.96	1.12336	down
Com_70_pos	calicoferol E	398.319	11.522	4198.91	2698.81	3372.49	6561.15	4495.4	17926.7	8978.31	16469.3	5167.9	26296.3	0.28497	-1.81112	0.0117333	0.96	1.13315	down
Com_92_pos	N-lauroylglycine iso	257.199	6.655	14286.9	4647.7	4663.44	7095.93	2786.38	27049.5	10557.1	49853.4	10881	38431.1	0.244789	-2.03039	0.0117517	0.92	1.34724	down
Com_91_pos	(2alpha,3alpha,5alpha,22R,23R)-2,3,22,23-Tetrahydroxystigmastan-6-one	478.366	11.857	19240.3	6114.42	8188.28	18026.5	9962.99	43928.2	16417	43185.6	20414.5	56759.8	0.340514	-1.55422	0.0118285	0.92	1.04658	down
Com_66_pos	C24 H46 N2 O3	410.351	10.758	1942.02	659.018	2270.51	2874.18	1973.03	7753.67	2710.83	6857.5	3475.29	8335.47	0.333602	-1.5838	0.0120866	0.96	1.07999	down
Com_98_pos	C25 H40 S2	404.256	9.58	3159.19	385.582	367.57	943.955	557.042	2223.3	2625.22	3098.72	3755.12	11109.5	0.237304	-2.07519	0.0124333	0.88	1.57515	down
Com_80_pos	C30 H38 N4 O2	486.299	12.145	15694.7	9946.42	8869.61	15536.7	3486.57	57910.8	11055.1	61415.3	32338.4	72353.5	0.227734	-2.13458	0.0128347	0.92	1.38563	down
Com_89_pos	C28 H46 N6 O	482.374	12.425	11594.3	6033.76	9573.74	12175.2	10149.9	52951.4	12622.1	34999	17609.8	40864.3	0.311399	-1.68316	0.0128672	1	1.036	down
Com_100_pos	C12 H12 N8	268.117	0.583	1208.47	151.484	130.134	180.372	58.9029	2406.79	362.808	4247.43	1051.88	2409.75	0.165037	-2.59914	0.01302	0.92	2.06679	down
Com_103_pos	C10 H19 O P S	218.09	0.618	9690.93	3744.16	1521.69	3112.4	1309.21	13477.9	4507.56	27884.7	18905.4	12666.2	0.250232	-1.99866	0.0132491	0.96	1.46865	down
Com_107_pos	C8 H8 N5 O P	221.047	0.599	1373.03	160.921	496.91	520.522	315.771	3807.84	1085.02	5877.85	772.583	4378.1	0.180082	-2.47327	0.0141318	0.92	1.64886	down
Com_71_pos	Uracil	112.028	0.629	19976.9	29250.3	8988.91	10576.6	5241.64	48437.5	20572.8	46658.2	64073	34331.7	0.345837	-1.53184	0.0143965	0.96	1.17532	down
Com_112_pos	C7 H14 N2 O	142.111	0.615	6335.87	1950.5	3855.91	2793.88	2081.34	15183.6	4370.45	19151.2	5507.5	12358	0.300818	-1.73304	0.0144896	0.92	1.12367	down
Com_115_pos	C21 H37 N iso	303.293	10.988	2831.13	3567.01	2448.46	4505.47	1542.58	227980	8095.19	94516.3	8662.7	113421	0.0329036	-4.92561	0.0145562	1	2.72024	down
Com_102_pos	2066503	418.236	11.266	4729.61	3253.71	693.774	2206.86	661.643	7335.54	3341.09	9874.44	8767.88	17658.6	0.245768	-2.02463	0.0146878	0.96	1.51797	down
Com_124_pos	Levetiracetam	170.106	0.625	3717.69	2299.94	1239.73	3262.93	834.701	15160.3	2360.55	47903.2	17335.5	10306.7	0.12201	-3.03493	0.0151875	0.92	1.81588	down
Com_78_pos	C26 H41 O4 P S2	512.217	11.978	1009.69	231.224	1315.49	1618.96	66.3303	16402.9	3762.41	6623.9	1398.28	6954.98	0.1207	-3.05051	0.0154783	0.96	2.36316	down
Com_123_pos	(1R,2R,3R,5Z,7E)-2-(2-Hydroxyethoxy)-9,10-secocholesta-5,7,10-triene-1,3,25-triol	476.35	11.44	7436.53	3423.43	2208.68	8732.45	5450.71	18610.3	13365.6	11637	6619.59	29480.6	0.341873	-1.54847	0.0165976	0.92	1.05035	down
Com_142_pos	1774244	173.117	0.631	1771.39	979.885	1534.25	396.658	775.21	23206.6	1258.86	44924	4907.25	17099.1	0.0597116	-4.06584	0.0166172	0.92	2.30082	down
Com_154_pos	C18 H40 N5 O3 P	405.288	8.471	8209.91	611.429	383.234	1286.86	2377.52	6663.92	5827.06	9463.27	31702.8	10793.5	0.199672	-2.3243	0.0166318	0.92	1.94367	down
Com_130_pos	4-amino-2-hydroxyamino-6-nitrotoluene	183.065	0.623	6613.8	987.735	2315.49	2616.16	1180.81	12244.6	3933.41	26569.7	4258.09	15481.1	0.21947	-2.1879	0.0176928	0.92	1.48216	down
Com_108_pos	C19 H49 N9 P2	465.357	10.051	1359.98	554.624	714.713	617.45	341.632	2114.21	1454.14	3799.59	918.284	6962.69	0.235322	-2.08729	0.0185347	0.96	1.26584	down
Com_133_pos	C16 H12 N6 O4	352.092	8.223	1658.43	337.989	659.467	465.392	268.785	3251.64	937.384	5111.9	972.053	3067.12	0.254126	-1.97639	0.0185628	0.92	1.3563	down
Com_140_pos	Cuauhtemone	252.173	6.63	7622.12	1523.55	2958.91	2613.72	1216.87	14317.2	5498.76	27790.3	3987.32	13699.1	0.244058	-2.03471	0.018641	0.92	1.37206	down
Com_152_pos	C15 H33 N O2	259.251	9.448	218.243	238.534	319	1225.23	215.88	4406.59	589.089	8343.12	717.686	5139.86	0.115485	-3.11422	0.0192059	0.92	1.91123	down
Com_159_pos	C17 H39 N7 S	373.298	11.953	989.168	338.784	601.243	667.047	493.761	8395.71	1398.22	5578.89	793.881	2923.91	0.16186	-2.62718	0.0195433	0.96	1.50789	down
Com_128_pos	Butyrophenone	148.089	12.278	798.954	285.179	539.056	1727.9	263.714	3364.35	1331.37	5136.99	857.147	2925.4	0.265496	-1.91324	0.0195936	0.92	1.35247	down
Com_125_pos	C10 H19 N3 O3 S	261.115	0.63	1103.05	264.741	310.791	290.985	107.279	1319.84	442.497	2876.55	1731.99	1150.79	0.276115	-1.85666	0.0196366	0.96	1.38654	down
Com_157_pos	N-Acetyl-L-leucine	173.105	0.627	10076.8	2010.62	1858.74	2776.61	1578.81	12147.7	3958.21	23570.3	7663.4	12970.8	0.303457	-1.72044	0.0197797	0.92	1.30979	down
Com_127_pos	C5 H14 N9 P	231.111	0.628	1348.7	421.025	253.116	288.564	163.412	1340.79	741.079	2145.54	1089.73	1658.64	0.354773	-1.49503	0.0198663	0.88	1.23725	down
Com_137_pos	Tocopherol	430.382	12.278	8471.02	2194.91	5073.69	16920.7	3798.19	29193.4	13480.3	43027.9	8967.81	29030.4	0.294733	-1.76252	0.0201019	0.92	1.28615	down
Com_134_pos	C16 H33 P3 S	350.152	6.871	2483.71	610.837	350.889	663.848	171.317	3592.44	1197.45	4443.6	1596.73	5554.09	0.261262	-1.93643	0.0202456	0.92	1.55023	down
Com_150_pos	C19 H37 N O	295.288	12.606	2637.56	494.057	1374.12	3268.81	1556.11	14458.3	2962.95	7235.81	2547.63	9433.11	0.254673	-1.97328	0.0212272	0.88	1.30761	down
Com_141_pos	C23 H45 N4 O P	424.334	11.671	4665.05	1468.69	1536.49	2897.55	1174.29	12146.6	3919.63	7035.46	2618.04	11469.2	0.315741	-1.66319	0.0215724	0.88	1.09867	down
Com_155_pos	C6 H19 N8 O3 P	282.133	0.63	1535.64	393.072	229.937	268.497	110.662	1841.24	517.146	4136.63	1537.37	1839.05	0.257085	-1.95968	0.0216289	0.96	1.5561	down
Com_163_pos	Misonidazole	201.075	0.604	4935.62	1128.21	1303.79	1924.28	794.352	7728	2406.32	17324	3199.1	11138.9	0.241319	-2.05098	0.0219501	0.92	1.38576	down
Com_121_pos	Hypoxanthine iso	136.039	0.629	248033	327143	84561.9	143761	46763.9	559026	211959	620541	814848	388539	0.327665	-1.60971	0.0219625	0.92	1.22685	down
Com_165_pos	nicotianamine	303.143	0.629	4889.98	1112.86	828.744	1319.87	927.653	4465.62	1681.46	9063.87	7575.77	5135.88	0.325153	-1.62081	0.0220856	0.92	1.23364	down
Com_143_pos	C20 H43 O2 P3 S	440.218	11.269	2091.4	1345.49	317.267	799.424	132.357	3746.45	1193.14	4594.33	3190.77	8499.63	0.220781	-2.17931	0.0226548	0.92	1.69306	down
Com_105_pos	C18 H37 N4 O3 P	388.261	10.028	1951.42	821.881	1749.67	805.161	376.981	7065.71	2251.51	3285.43	1473.68	2842.46	0.337206	-1.5683	0.0233794	0.92	1.11564	down
Com_166_pos	C10 H23 N9 O P2 S	379.124	0.628	403.122	302.56	129.65	227.334	79.9663	1088.31	179.441	1792.82	2884.06	802.248	0.169357	-2.56186	0.0255971	0.88	1.54806	down
Com_158_pos	N-Acetyl-L-glutamic acid	189.064	0.628	3854.72	3150.82	1449.57	1487.95	941.436	3619.97	2923.87	9777.94	14858	4175.78	0.307858	-1.69966	0.026867	0.88	1.08879	down
Com_199_pos	Stachydrine	143.095	0.627	10459.3	6141.03	7353.12	10270.9	6606.39	85792.3	10470.2	163727	18123.4	53241.3	0.123224	-3.02065	0.0270691	1	1.64459	down
Com_178_pos	C17 H34 N O6 P	379.211	7.11	1651.46	837.629	408.404	593.438	264.326	3055.99	580.69	4155.89	2104.45	3199.31	0.286741	-1.80218	0.0271924	0.88	1.25364	down
Com_164_pos	1794967	285.23	8.07	1830.93	566.905	584.183	707.171	287.029	2394.4	1042.58	2870.47	1023.58	3022.21	0.384055	-1.38061	0.0280155	0.92	1.01977	down
Com_194_pos	N-Acetyl-L-histidine	197.08	0.63	11908.8	2626.32	2963.59	4436.23	2615.5	12938.8	4148.61	23544.7	12579.5	14148.6	0.364464	-1.45615	0.029463	0.92	1.09636	down
Com_175_pos	C4 H16 N9 O2 P	253.118	0.626	871.88	1034.12	187.749	366.618	86.3813	1149.16	696.755	2141.7	4813.25	1295.73	0.252238	-1.98714	0.0314769	0.92	1.50299	down
Com_184_pos	C28 H54 N3 O6 P	559.372	11.551	463.505	113.178	138.748	666.247	92.408	646.399	342.633	1527.84	648.379	1244.15	0.334305	-1.58076	0.0319657	0.84	1.2726	down
Com_188_pos	N.pi.-Methyl-L-histidine	169.085	0.601	5905.57	1462.95	1938.48	2578.1	943.085	6970.01	3611.64	12727.5	3084.06	7879.2	0.374301	-1.41773	0.0320294	0.92	1.04494	down
Com_173_pos	Desonide	416.22	11.47	438.244	228.489	268.964	658.293	492.371	1265.76	392.445	2162.96	1911.43	8090.06	0.150938	-2.72798	0.0326337	0.88	1.47146	down
Com_215_pos	C5 H20 N7 O6 P	305.122	0.614	3292.02	819.871	310.417	772.889	517.005	2249.99	1483.59	3712.22	5597.46	2253.82	0.373418	-1.42114	0.0331515	0.88	1.20462	down
Com_179_pos	C30 H46 N4	462.371	12.456	8307.83	1215.74	13057.2	5904.9	1310.46	28018.5	5667.45	55859.5	12896.4	27544.2	0.229226	-2.12516	0.0342494	0.84	1.56704	down
Com_217_pos	2-(dimethylamino)-5,6-dimethylpyrimidin-4-ol	167.106	0.631	6921.49	818.55	250.692	2620.07	216.204	9883.34	3400.41	13828.5	3201.4	14482.9	0.241693	-2.04875	0.0351139	0.92	2.00624	down
Com_218_pos	(2R,3S)-3-Hydroxy-8-methyl-8-azabicyclo[3.2.1]octane-2-carboxylic acid	185.105	0.632	3967.93	949.163	739.315	1335.89	756.338	3983.12	1458.97	6239.06	2996.48	3979.83	0.41531	-1.26774	0.0353486	0.92	1.03687	down
Com_221_pos	C16 H10 N O6 P	343.026	5.52	38976.6	12159.5	5231.78	18350.3	6751.23	55686.9	17398.9	65624.3	24143.7	67596	0.353524	-1.50012	0.0355334	0.88	1.17546	down
Com_208_pos	(2E)-5-methyl-2-phenylhex-2-enal	188.12	12.278	1106.12	353.624	774.712	2073.19	458.57	3711.26	1464.17	5102.14	965.611	2677.25	0.34239	-1.54629	0.0357285	0.88	1.08306	down
Com_216_pos	C11 H17 P S	212.08	0.629	10833.8	1824.23	2568.87	3772.57	2496.05	10114.8	3495.09	19589.9	11898.1	11585.3	0.379223	-1.39888	0.0358104	0.88	1.09821	down
Com_330_pos	C8 H18 O5	194.116	3.981	4208.52	5956.4	6980.26	5759.93	2228.09	3511.1	398.778	1282.72	1452.38	2736.42	2.67905	1.42172	0.0358804	0.92	1.32973	up
Com_228_pos	3-(2-Oxo-2,3-dihydro-1,3-benzoxazol-3-yl)propanoic acid	207.053	5.52	529688	163433	66835.7	260267	94202.8	872800	230223	1.22189e+06	310027	959533	0.310039	-1.68948	0.036106	0.88	1.27466	down
Com_224_pos	C13 H23 O P S	258.122	0.628	6014.78	1380.08	911.493	1959.73	933.084	6091.84	1647.21	14039.3	6654.45	7156.93	0.314674	-1.66807	0.0361358	0.92	1.28277	down
Com_225_pos	C14 H7 O6 P	301.999	5.521	42154.1	13007	5565	20241	7633.74	60702.3	18732.7	71300.6	26022.2	73371.6	0.35422	-1.49728	0.036381	0.88	1.17303	down
Com_205_pos	C22 H47 O5 P	422.315	9.557	10335.2	3842.21	980.961	1637.05	565.226	6945.3	3229.35	16533.3	10582.6	45599.7	0.209441	-2.25538	0.0367565	0.88	1.66198	down
Com_213_pos	D-PANTOTHENIC ACID	219.111	3.768	16149.6	7125.57	1625.78	2247.05	1241.58	14355.1	8951.94	23295.8	19320.5	12852.6	0.360384	-1.47239	0.0371487	0.88	1.41559	down
Com_236_pos	2-Indolylformic acid	161.048	5.519	99866.3	27634.8	12743.9	48743.7	15963	146564	41292.5	204513	57387	169315	0.331063	-1.59482	0.0391789	0.88	1.24622	down
Com_223_pos	C12 H14 N6 O2	274.117	0.627	4711.13	663.807	560.137	1664.96	443.981	3518.78	1901.96	5424.43	7369.7	3122.24	0.376996	-1.40738	0.0392323	0.88	1.27533	down
Com_258_pos	2-Acetamido-2-deoxy-D-glucono-1,5-lactone	219.074	0.601	5238.54	896.767	142.74	1477.5	512.46	4905.45	2728.47	3957.06	6216.11	9148.77	0.306724	-1.70499	0.0400706	0.88	1.69472	down
Com_233_pos	C14 H18 N4 O4 P2	368.08	5.521	60933.9	20050.9	8905.77	28585.3	9372.59	85358.2	27500.3	93199.8	35322.5	98284	0.376396	-1.40968	0.0408091	0.88	1.11959	down
Com_254_pos	C7 H18 N9 O5 P	339.118	0.622	2267.35	1152.77	169.22	1036.06	370.272	2504.06	2003.98	2249.02	3269.25	3772.65	0.362033	-1.46581	0.0408788	0.92	1.31045	down
Com_253_pos	C14 H18 N6 O3	318.144	5.534	1841.92	326.119	424.907	613.362	259.138	3889.34	862.755	7021.37	629.579	3179.3	0.222396	-2.1688	0.0420041	0.92	1.4299	down
Com_239_pos	C16 H20 N3 P S	317.112	0.629	691.083	430.883	115.535	112.883	71.0414	941.012	195.622	2190.49	3823.93	604.492	0.183279	-2.44789	0.0438507	0.88	1.58486	down
Com_226_pos	1-Phenyl-1,3-octadecanedione	358.287	11.502	20311.8	9200.57	21530.8	20919.6	5663.03	95974.4	21037.7	73324.4	14016.8	68585	0.284408	-1.81397	0.0442116	0.84	1.11034	down
Com_272_pos	5-Indolol	133.053	6.575	685.67	669.726	681.801	604.69	442.41	23776.6	3399.66	7906.23	338.737	10723.1	0.0668402	-3.90314	0.0478007	0.8	2.05336	down
Com_230_pos	C24 H40 N2 O5	436.294	9.77	9253.59	2461.74	2819.8	3311.22	1606.04	8725.88	3080.33	16314.5	7053.25	25377.9	0.321252	-1.63822	0.048696	0.84	1.10025	down
Com_265_pos	C13 H11 N O S	229.056	9.813	7657.67	3268.53	2510.48	2643.04	143.465	43561.7	2864.44	98485.9	5827.66	16509.7	0.097	-3.36587	0.0490147	0.88	2.12061	down
Com_235_pos	C28 H43 O P S	458.276	9.767	6264.05	1454.21	1807.87	2057.37	1077.08	5366.71	2104.51	10088.8	4244.5	15535.6	0.339061	-1.56038	0.0491967	0.88	1.08108	down
Com_273_pos	C10 H12 N2 O4 P2	286.027	5.521	63877	20611.9	9399.39	33368.4	11023.8	97540.1	28151.6	98983.7	33568.4	100872	0.385058	-1.37685	0.0498505	0.88	1.0845	down
